# Supplementary material
Source: Springer Nature journal article supplement (https://www.springermedizin.de/resource/supplementary/12986_2011_315_MOESM5_ESM.pdf/25655814)

Essential Amino Acids  
(nmol  $\bullet$  mL<sup>-1</sup>)

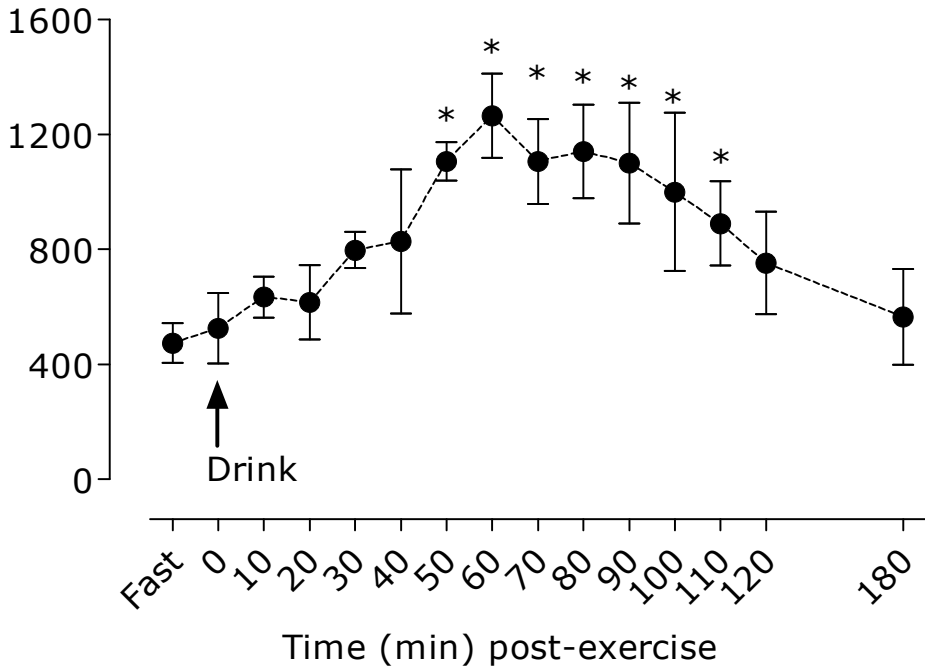

Supplement: MOESM5 [file 25655814]
